# Supplementary material
Source: Research Square preprint supplement (doi:10.21203/rs.3.rs-9681346/v1)
Supplement: Supplementary file 1 [file 6fbba8dda84fb264bd9d1579.docx]

Supplementary Material

# Supplementary Figures and Tables

## Supplementary Figures

##
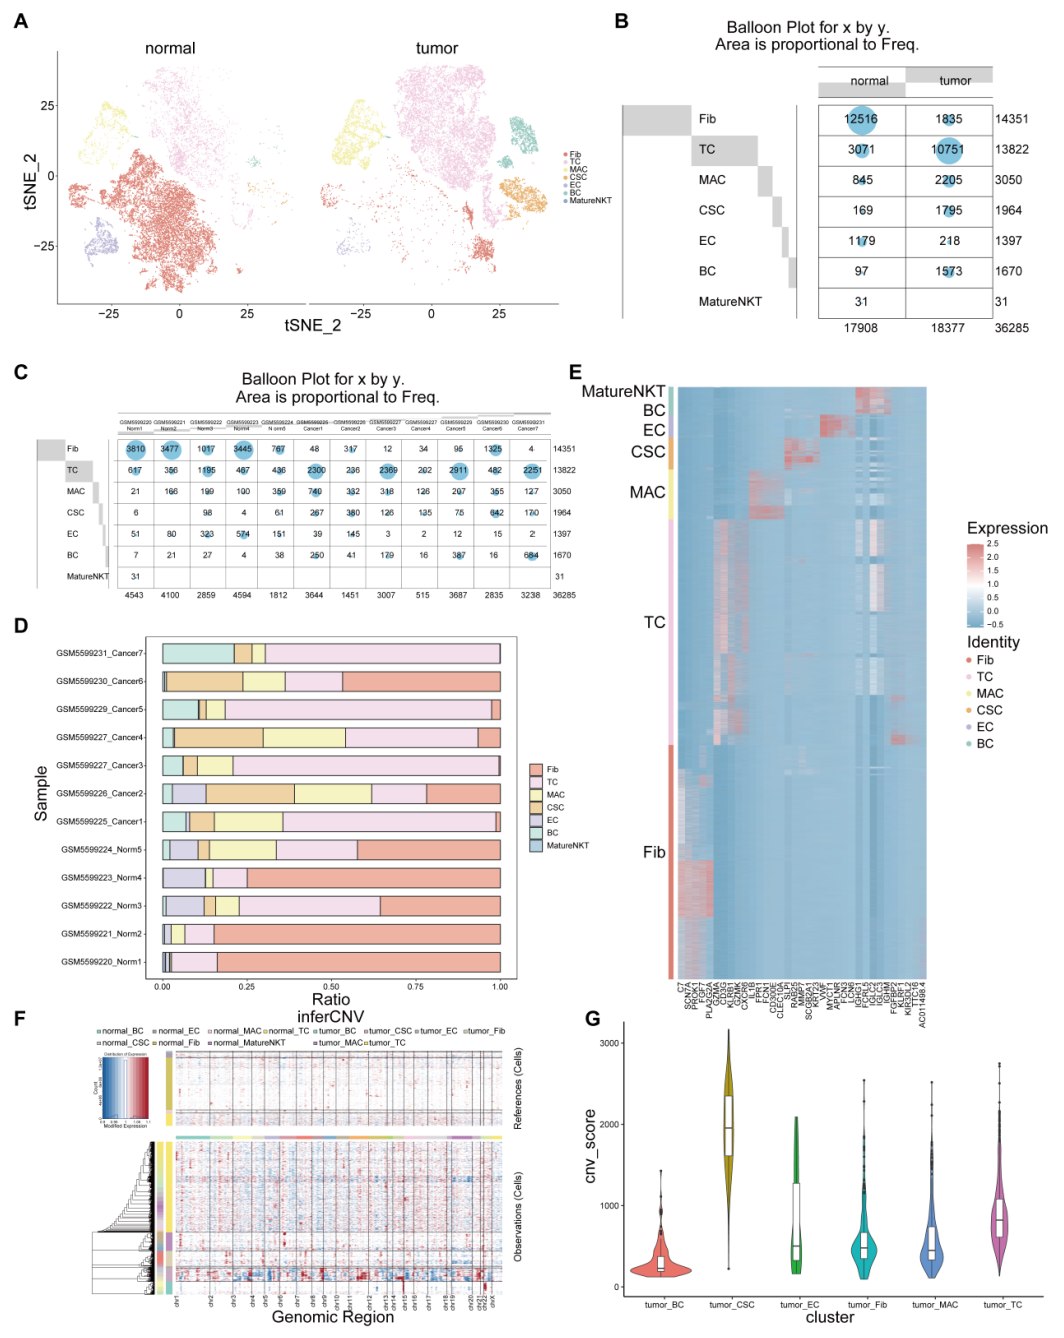


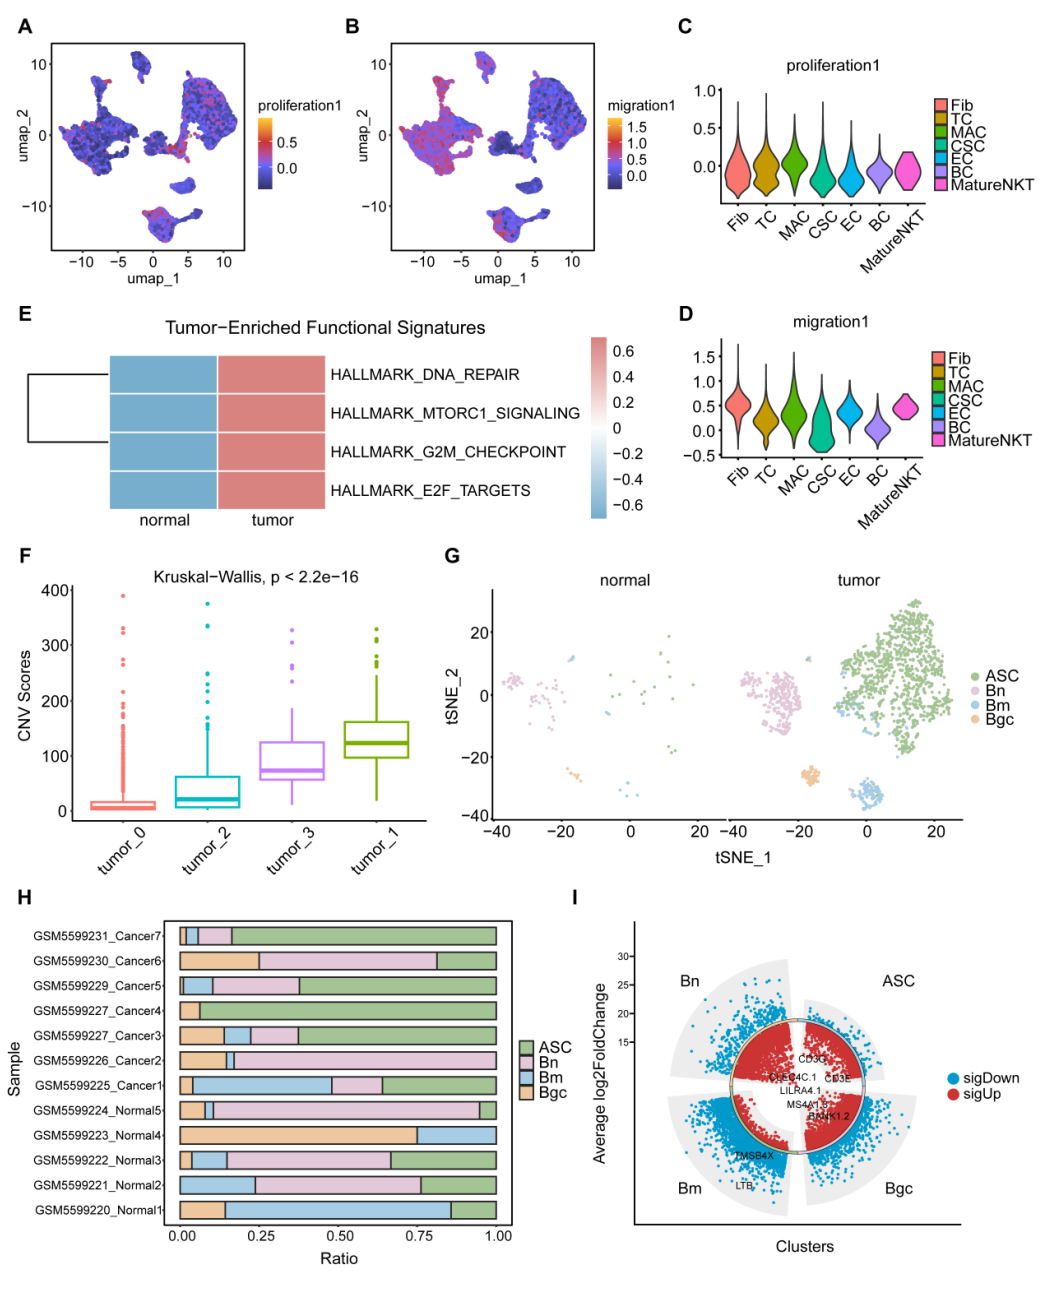


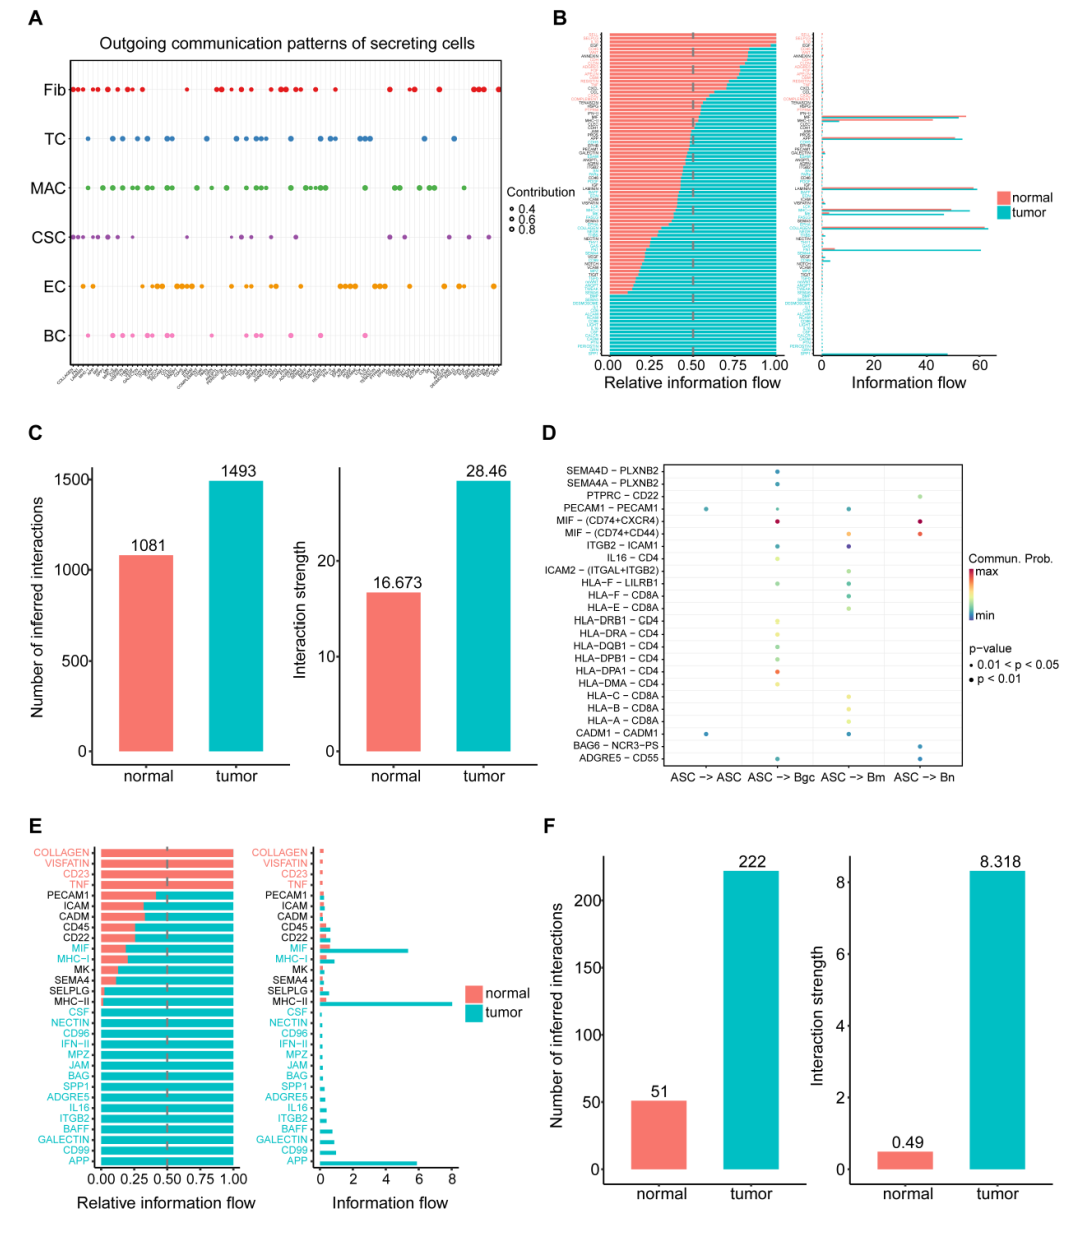


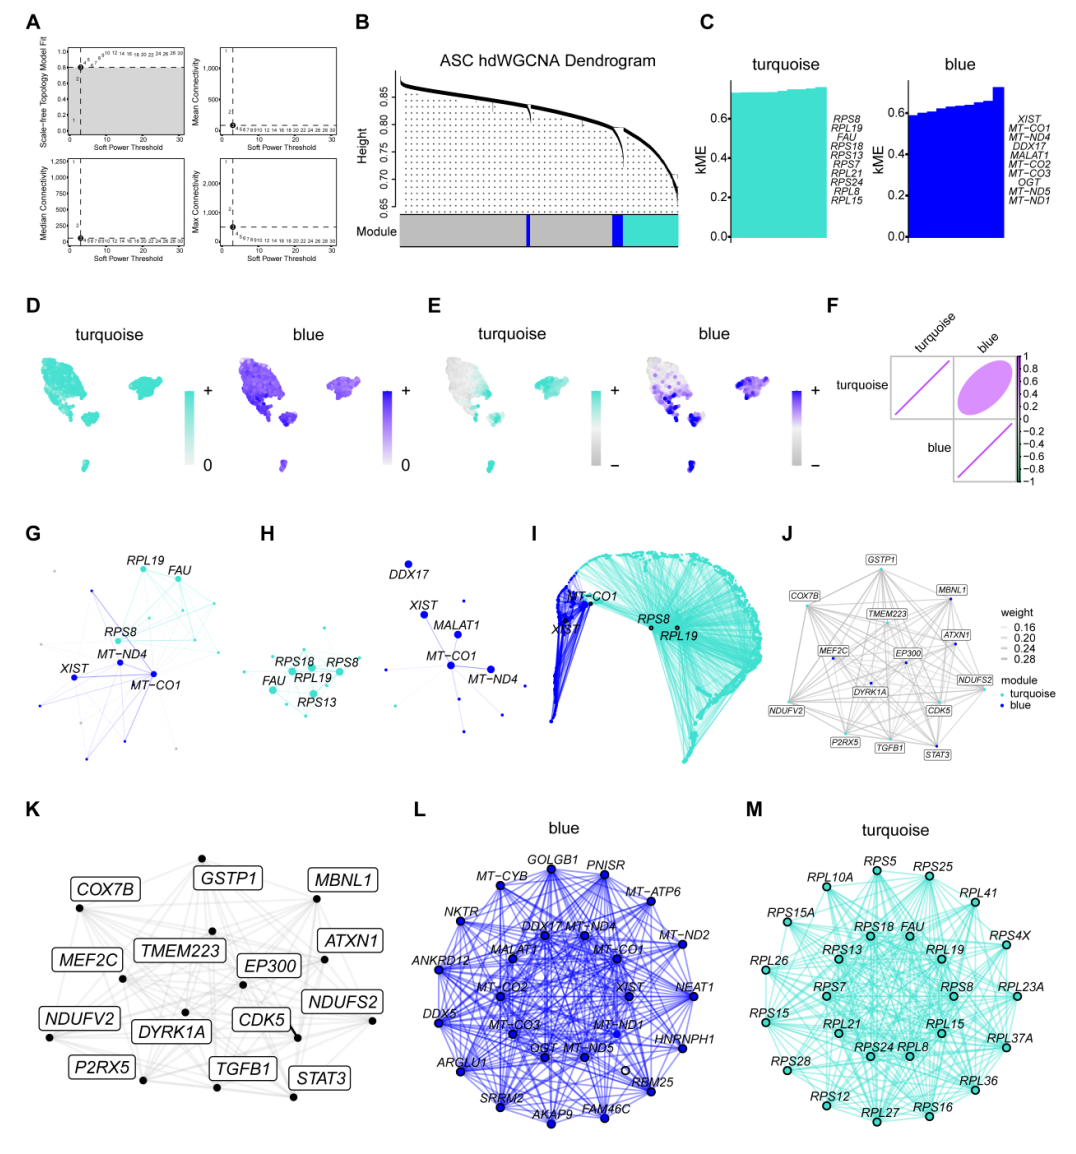


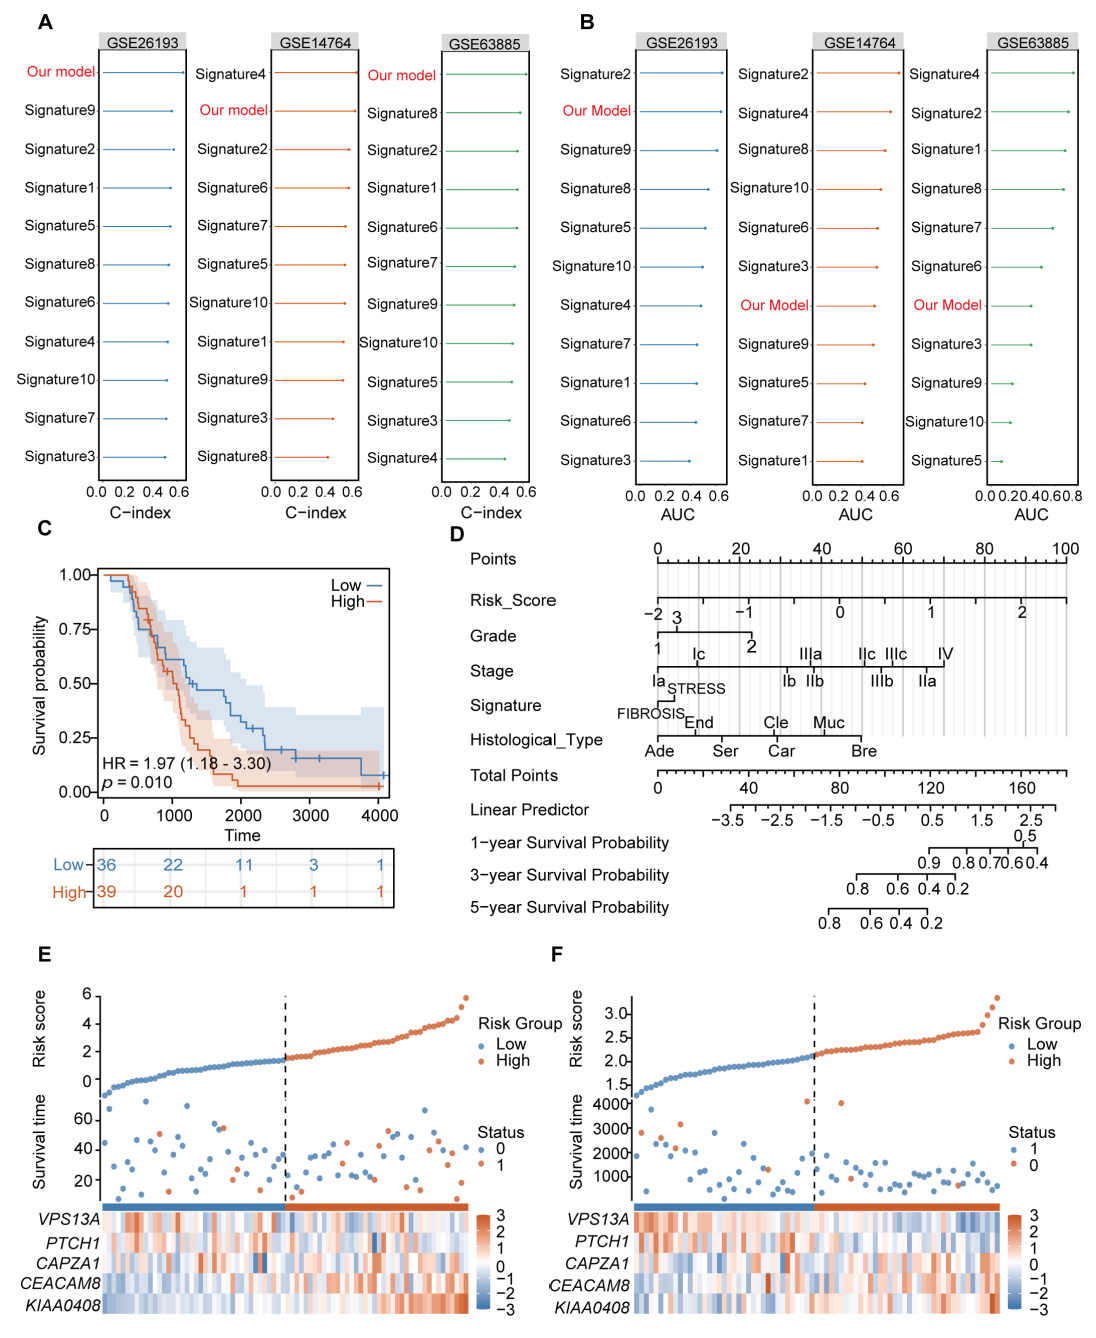


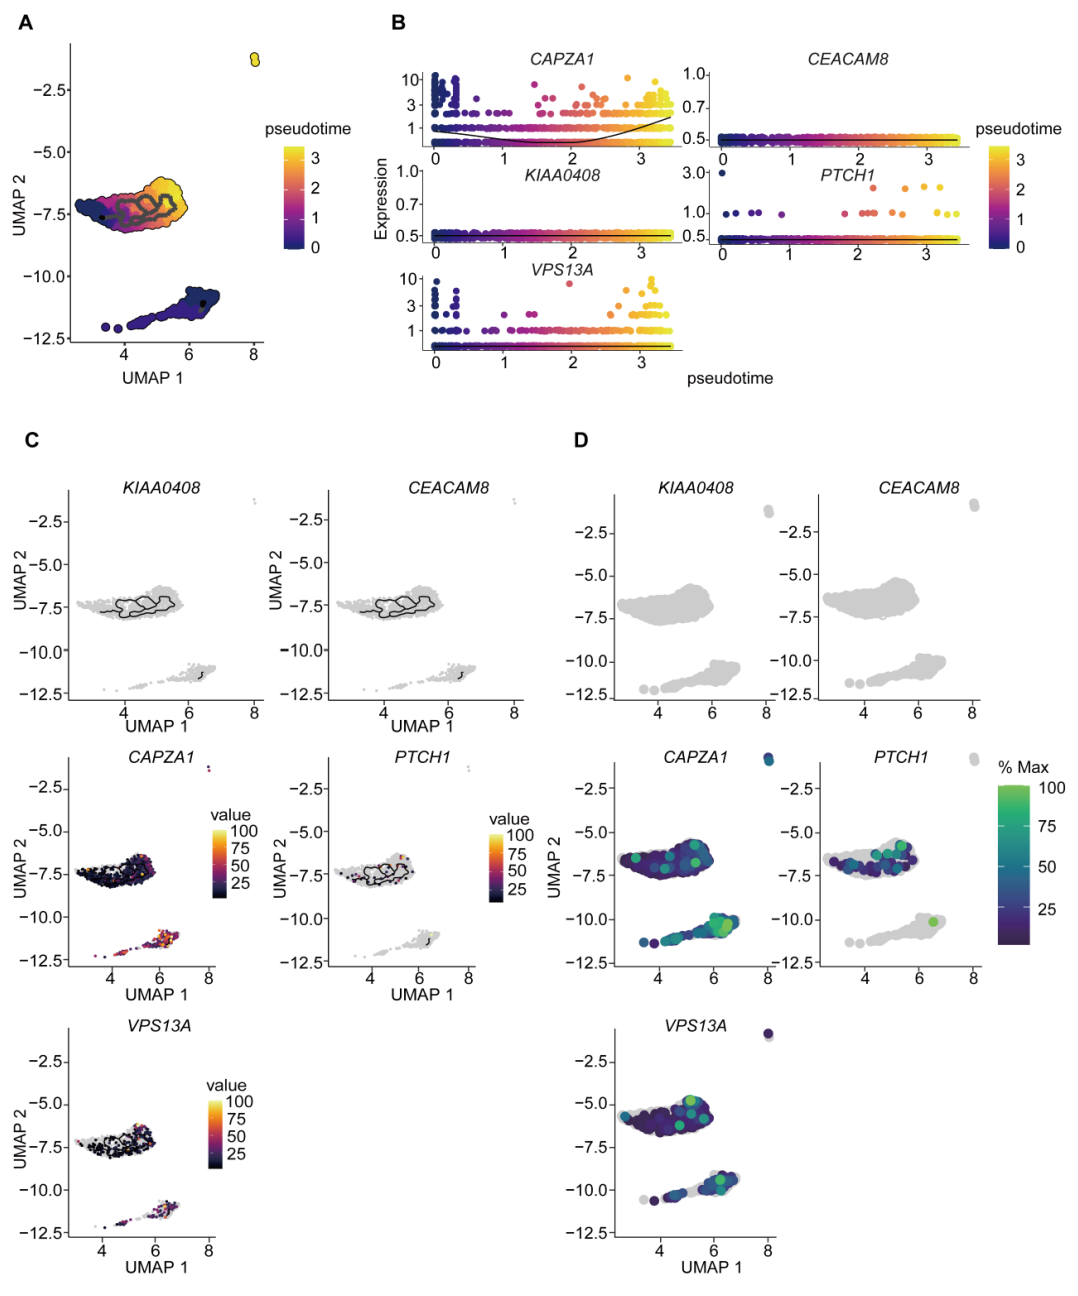


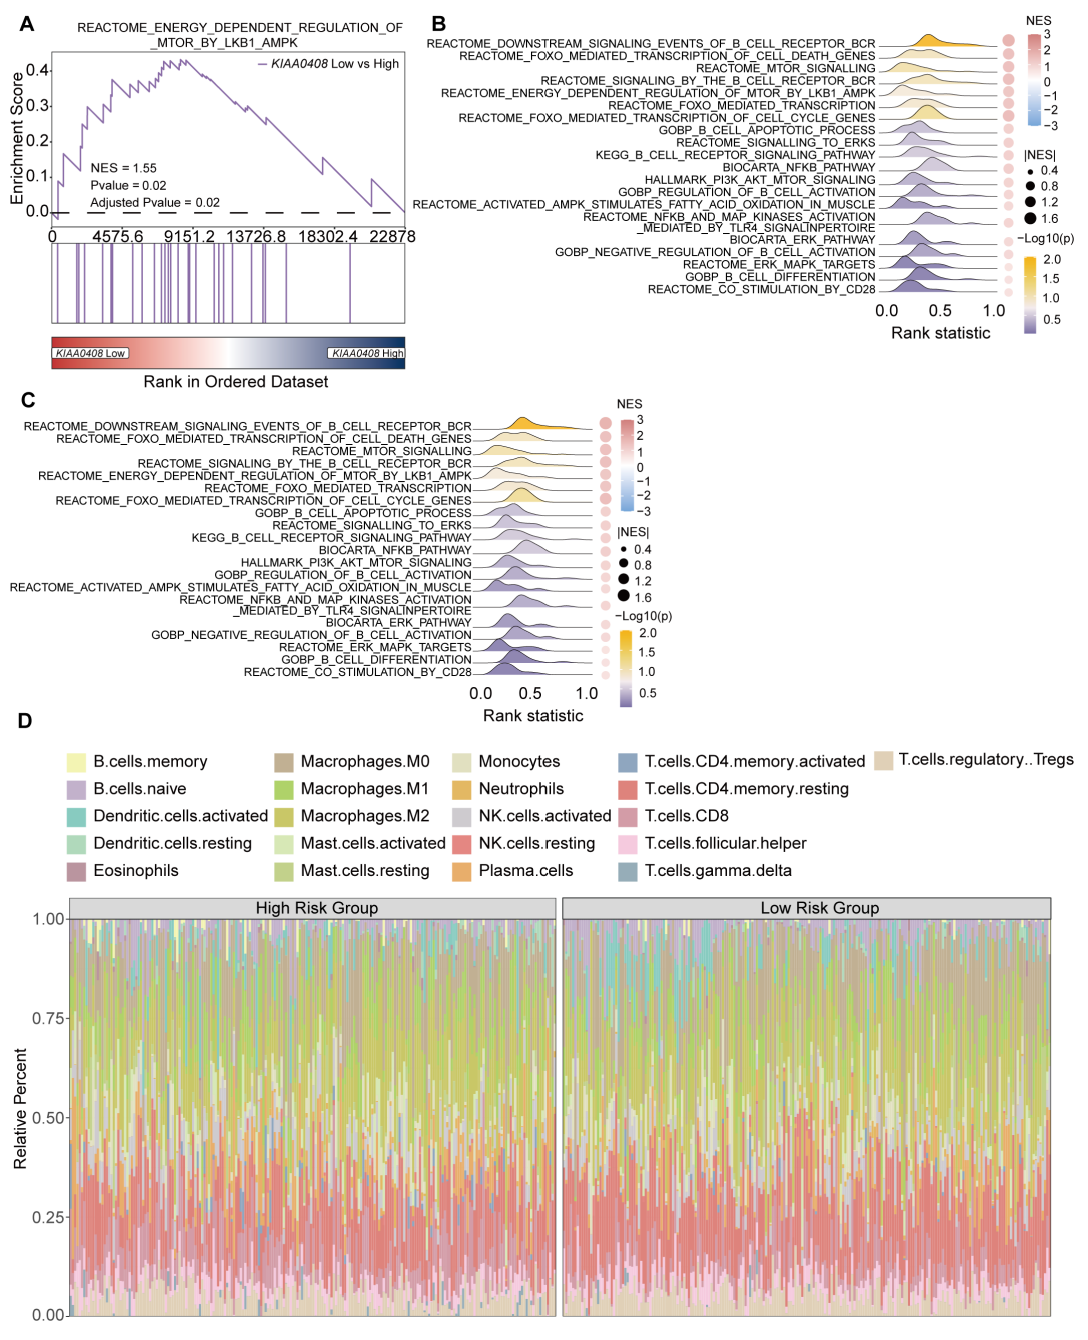


**Supplementary Figure 1. scRNA-seq clustering and CNV analysis in the GSE184880 cohort. (A)** Comparative display of t-SNE distribution differences among various cell types in the normal and tumor groups. **(B)** Number of each cell type in the normal and tumor groups. **(C)** Number of each cell type in individual samples. **(D)** Cell proportion plots for each cell type in individual samples. **(E)** Heatmap of DEGs via FindAllMarkers for each cell type. **(F)** Heatmap of CNV analysis for each cell type in the normal and tumor groups. **(G)** Violin plot of CNV scores for each cell type in the tumor group.

**Supplementary Figure 2. Single-cell landscape of the GSE184880 cohort and systematic dissection of B-cell subsets. (A, B)** UMAP plots of single-cell proliferation and migration scores in the GSE184880 cohort based on the AddModuleScore function. **(C, D)** Proliferation and migration scores for each cell type. **(E)** Heatmap of GSVA-enriched functional features in normal versus tumor cohorts. **(F)** CNV scores for B cell subpopulations in the tumor cohort. **(G)** Comparative display of t-SNE distribution differences between normal and tumor cohort B cell subpopulations. **(H)** Cell proportion plots for B cell subpopulations in individual samples. **(I)** Chord plots of gene differential expression analysis for B cell subpopulations.

**Supplementary Figure 3.** **Cellular communication analysis of the GSE184880 cohort and B cell subtypes. (A)** Contribution of six cell types to different cell-to-cell communication patterns. **(B)** Relative and absolute information flow of cellular communication across tissues among six cell types. **(C)** Number and strength of cellular interactions among six cell types in normal and tumor tissues. **(D)** Heatmap of ligand-receptor interactions between ASC and other B cell subtypes. **(E)** Relative and absolute information flow of cellular communication cross tissues among three B cell subtypes. **(F)** Number and strength of cell interactions among B cell subtypes in normal and tumor tissues.

**Supplementary Figure 4.** **hdWGCNA reveals co-expression modules in ASCs (A)** Scale-free topological model fitting index and connectivity curves as a function of soft threshold. **(B)** ASC hdWGCNA gene clustering dendrogram and module partitioning. **(C)** Connectivity scores of characteristic genes within each module. **(D, E)** Expression distribution of characteristic genes from each module in the B cell UMAP dimensionality reduction space. **(F)** Correlation matrix between gene modules. **(G, H, I)** Interaction networks of core genes within each module. **(J, K)** Interaction networks of characteristic genes within each module. **(L, M)** Interaction network of characteristic genes in the blue and turquoise modules.

**Supplementary Figure 5.** **Independent validation and performance evaluation of the machine learning model. (A)** C-index ranking of our model versus published features in the validation cohort. **(B)** AUC ranking of this model versus published features in the validation cohort. **(C)** Survival analysis in the GSE63885 cohort. **(D)** Prognostic prediction nomogram integrating risk scores and clinical-pathological features. **(E)** Risk score plot in the GSE14764 cohort. **(F)** Risk score plot in the GSE63885 cohort.

**Supplementary Figure 6. Pseudotemporal dynamics of model gene expression. (A)** Pseudotime trajectory plot of B cells. **(B)** Dynamic expression changes of model genes along pseudotime. **(C)** Differentiation trajectories and expression distributions of model genes in the B cell UMAP dimensionality reduction space. **(D)** Percentage distribution of model gene expression in the B cell UMAP dimensionality reduction space.

**Supplementary Figure 7.** **Model gene enrichment analysis and immune infiltration analysis. (A)** GSEA of *KIAA0408* high-expression and low-expression groups in the GSE26193 cohort. **(B, C)** Significant GSEA pathway maps related to *KIAA0408* in the GSE14764 and GSE63885 cohorts. **(D)** Stacked bar chart showing the proportion of immune cell composition between high-risk and low-risk groups.

## Supplementary Tables
